# Supplementary material for: A Fast Screen and Shape Recognition Algorithm for Multiple Change-Point Detection
Source: Hindawi journal article supplement (doi:10.1155/2018/8371085), 2018-10-11
Supplement: f1 [file 8371085.f1.xlsx]

## Sheet: Sheet1
ACTIVE POWER	REACTIVE POWER
3.925	0.668
2.304	0.157
1.343	-0.804
2.109	-0.561
3.727	0.436
4.149	0.474
4.069	0.128
3.316	0.616
4.415	0.1
3.955	0.654
1.426	-0.844
3.341	-0.561
3.44	0.556
3.996	1.207
2.387	-0.234
2.068	0.782
2.217	0.924
2.518	1.217
2.406	1.33
2.255	0.887
1.347	0.368
2.107	0.281
2.856	0.234
2.389	0.135
1.646	-0.119
3.241	-1.026
3.779	-0.781
5.063	-0.786
4.739	-0.503
4.951	-0.673
4.744	-0.125
4.56	0.223
4.944	0.295
2.183	0.708
3.754	0.536
3.425	0.386
3.456	-0.371
3.028	0.212
3.705	0.178
4.031	-0.197
4.004	0.253
4.315	-0.099
4.013	0.186
3.191	0.212
3.741	-0.396
2.457	-0.181
3.179	-1.073
1.246	1.278
0.545	1.354
-0.132	1.526
3.208	2.133
3.83	2.795
3.679	2.298
2.148	2.486
3.531	1.905
3.329	1.428
3.055	0.48
3.301	1.262
3.286	1.262
4.087	1.918
4.335	2.218
4.459	2.358
3.954	2.729
4.689	2.642
5.179	2.981
5.225	3.012
4.448	3.237
3.986	3.381
5.216	3.394
2.632	3.267
2.043	2.975
1.143	3.083
-8.011	4.019
-8.013	4.075
-7.741	3.968
-5.419	4.51
3.304	2.814
5.564	1.909
7.542	1.045
8.006	0.989
9.649	1.888
10.621	2.154
10.902	2.002
10.825	2.096
10.543	2.886
10.671	2.668
11.295	2.299
10.971	2.445
11.281	2.316
10.352	2.529
8.574	2.219
9.259	1.653
9.442	1.282
8.396	1.131
8.302	0.929
6.501	0.987
8.464	0.867
0.761	-0.705
0.694	-0.507
4.942	1.881
8.002	4.294
12.032	4.651
12.339	5.858
13.35	6.591
14.62	8.63
15.799	8.862
13.827	8.133
14.92	7.507
15.274	8.569
14.832	8.594
15.698	8.563
15.649	8.429
15.297	8.717
15.477	7.835
16.144	8.497
15.888	8.457
14.719	8.655
12.43	7.063
14.543	7.125
14.839	7.202
15.686	7.799
15.078	8.456
14.686	7.584
15.24	8.713
16.619	8.709
14.798	8.212
16.49	8.401
16.326	7.064
14.997	6.929
14.486	7.222
17.438	7.309
17.278	8.066
16.814	7.772
16.962	7.261
15.306	7.678
15.679	7.929
15.914	7.619
15.335	7.951
16.164	7.63
15.201	8.36
16.148	7.333
13.544	6.781
11.333	5.031
12.553	4.739
10.772	3.093
9.135	3.842
9.612	3.248
10.297	4.832
10.954	4.91
11.63	5.241
11.245	4.917
11.99	5.312
11.677	5.271
10.213	4.164
6.976	5.317
1.095	5.772
0.966	6.181
1.554	5.224
13.257	3.428
13.549	3.562
13.206	3.944
13.284	4.236
13.25	5.204
13.869	5.582
12.606	5.239
11.576	5.234
12.939	4.985
13.312	5.696
13.778	5.582
14.641	6.117
13.901	5.918
14.085	6.147
15.003	6.198
14.436	6.467
14.636	7.235
14.541	7.334
14.765	7.766
15.23	7.604
15.481	8.262
15.712	7.934
15.069	7.18
12.398	8.44
14.433	8.13
14.762	7.942
14.359	8.626
14.537	9.022
14.936	8.794
13.97	7.996
13.378	8.29
13.805	7.54
13.182	7.209
10.469	6.955
11.502	6.085
11.611	7.09
13.105	6.661
12.925	6.285
12.817	6.421
14.483	6.342
15.01	7.051
15.509	6.829
14.944	6.672
15.348	7.079
15.791	6.429
14.326	5.911
14.926	6.981
13.031	6.947
15.492	7.436
15.32	7.291
15.899	7.957
15.629	6.314
15.606	7.081
15.364	7.35
15.265	7.511
13.387	7.64
15.49	7.06
14.237	6.657
12.43	5.691
10.901	5.058
10.352	4.558
12.06	6.254
13.747	6.146
14.622	6.668
14.99	6.779
14.317	7.691
14.595	6.979
14.553	7.02
14.187	6.138
13.373	6.48
13.134	6.363
13.528	8.67
14.044	8.606
12.895	8.316
13.158	6.728
14.25	7.589
14.347	7.608
15.507	7.356
15.509	7.384
15.755	6.6
15.227	5.273
16.387	5.402
17.944	7.108
18.838	5.65
19.168	5.303
16.049	3.681
16.443	3.898
15.996	4.372
16.964	5.624
17.436	5.888
18.151	5.104
18.027	5.069
19.349	5.825
18.112	5.402
18.741	5.685
18.472	5.13
19.283	5.564
18.998	5.709
19.134	5.868
19.803	5.469
18.899	6.08
17.213	5.836
19.065	5.538
19.175	5.895
19.179	5.973
19.265	5.778
18.724	6.513
19.028	5.889
15.857	4.356
15.406	3.43
15.536	4.77
15.646	6.516
17.163	6.324
17.337	6.151
17.912	5.782
16.299	6.123
17.348	6.095
16.519	6.435
15.598	5.39
16.768	4.736
15.113	5.234
15.444	5.798
15.954	5.873
15.535	6.013
15.567	6.34
15.975	5.848
14.502	6.657
14.254	6.345
14.86	6.261
14.718	6
15.591	4.89
13.841	4.327
11.854	4.382
11.136	4.419
11.928	5.71
11.91	6.151
13.726	6.333
14.07	6.722
14.643	7.47
13.987	6.88
15.092	6.686
15.234	7.516
14.967	7.328
13.974	6.776
14.078	7.311
13.88	7.245
14.781	7.925
14.729	7.678
14.557	7.735
14.577	7.91
14.317	8.17
14.493	8.228
12.759	7.708
13.147	7.693
11.971	7.58
10.585	6.268
11.137	7.126
11.173	8.075
14.026	8.679
14.207	8.574
14.376	8.68
13.864	8.966
14.434	8.597
14.745	8.694
14.873	9.046
15.845	9.035
11.456	3.172
10.81	3.196
10.835	3.089
12.042	5.498
12.085	6.447
10.979	7.304
11.439	8.489
11.152	7.915
10.661	7.671
9.99	7.323
9.831	7.361
9.147	7.379
10.445	7.61
9.711	6.919
9.239	7.148
8.795	6.318
7.73	5.768
8.866	6.582
11.29	7.651
11.584	7.483
12.713	7.247
12.699	7.462
12.706	7.568
12.32	6.956
12.71	7.315
11.903	8.379
13.51	7.746
13.33	8.025
13.254	8.148
13.649	8.476
14.194	8.145
14.048	7.989
14.411	7.745
14.308	7.356
16.33	7.084
16.988	6.481
16.528	6.75
19.04	5.904
16.834	6.529
16.097	6.793
17.017	6.264
18.282	6.57
17.505	6.58
16.572	6.559
19.384	6.605
20.252	6.513
21.019	7.125
20.543	6.983
20.595	7.349
20.588	7.642
20.979	7.774
21.125	8.296
21.412	8.131
20.043	8.045
19.794	7.476
19.181	9.188
19.503	8.967
18.331	8.934
17.828	9.139
18.057	8.784
16.332	7.648
15.056	6.686
10.389	4.63
10.547	5.353
11.353	5.535
15.59	6.007
15.798	7.387
20.588	7.959
21.07	8.465
22.076	9.12
21.979	8.805
22.292	10.067
20.894	9.298
20.538	9.191
20.987	9.219
21.57	10.118
21.689	9.691
21.153	10.35
21.771	10.332
21.908	10.357
20.888	10.836
21.754	11.037
20.348	11.201
19.768	11.902
19.797	11.548
20.691	10.859
20.408	10.82
19.905	10.158
19.953	10.352
20.908	10.952
20.943	11.36
20.817	11.492
19.726	12.514
20.181	12.604
18.156	11.786
18.563	11.462
19.202	13.786
18.234	12.018
19.314	10.336
19.626	10.148
20.416	9.983
19.483	10.82
19.281	9.915
19.921	9.451
18.927	9.574
20.839	8.739
20.432	8.952
21	9.969
21.563	9.629
21.454	9.266
20.917	8.329
22.465	7.153
20.166	6.531
13.356	7.343
10.301	9.086
11.202	8.804
10.592	8.246
10.528	8.148
10.123	8.576
9.438	8.371
17.2	8.138
21.817	8.278
20.889	8.469
21.887	7.998
20.697	7.475
20.888	8.214
20.579	9.058
20.689	8.835
19.277	8.515
22.37	8.133
22.259	7.721
22.063	8.023
21.693	7.74
21.059	7.783
21.254	7.899
20.896	8.299
20.564	9.159
20.604	9.268
20.628	9.627
19.163	9.174
20.526	8.727
20.969	8.007
20.958	8.745
19.592	8.619
19.33	8.789
21.525	8.654
21.838	9.175
21.772	9.498
21.72	9.342
16.81	10.267
20.435	9.205
21.064	8.171
21.061	9.658
21.757	9.944
21.836	10.225
20.982	9.602
21.345	9.111
19.942	5.766
16.71	3.553
16.269	2.436
16.762	2.687
18.804	4.997
20.267	5.972
17.958	6.859
20.87	7.12
19.747	6.98
20.29	6.86
21.4	7.789
22.074	7.079
23.601	7.981
22.287	7.805
23.325	8.071
22.63	8.41
23.917	8.904
24.111	9.053
22.666	9.245
24.13	9.539
23.819	9.658
23.244	9.871
22.269	10.223
23.044	8.501
23.676	9.092
20.289	7.735
21.08	8.291
21.3	7.978
22.893	9.204
23.526	8.85
24.454	9.146
24.537	9.495
24.419	8.907
24.174	8.609
25.425	8.679
22.969	7.844
25.477	8.971
25.469	8.326
22.392	5.816
22.057	4.188
22.228	4.188
22.411	3.907
22.38	3.872
22.433	4.118
22.538	5.01
20.842	5.607
22.563	5.244
23.295	4.907
23.422	5.344
22.343	2.884
21.982	1.95
22.402	3.329
22.672	4.649
24.579	5.246
25.033	5.336
25.454	5.501
24.957	4.645
24.576	6.04
25.034	4.884
25.041	6.138
23.404	7.252
25.669	7.63
25.154	7.289
23.037	6.76
22.236	5.509
23.362	6.882
22.607	6.699
12.033	9.556
12.072	9.731
16.695	9.702
24.128	7.497
22.051	8.118
22.679	7.983
23.132	8.331
21.286	8.587
22.621	8.292
21.824	8.894
20.328	8.037
21.299	7.888
21.061	7.955
20.452	8.257
20.362	7.716
20.505	8.216
20.124	7.116
17.467	5.661
16.355	2.301
15.028	3.713
15.496	4.138
16.085	3.669
16.334	4.55
16.203	4.168
14.83	4.492
16.876	5.042
17.301	4.716
16.646	6.001
16.515	6.152
16.271	6.352
16.703	6.969
16.552	6.926
14.904	5.676
14.617	5.816
14.97	6.483
15.334	6.302
14.897	7.015
15.777	6.921
15.457	7.067
17.05	6.915
16.134	7.199
16.665	6.523
15.949	7.994
15.218	6.09
15.707	7.474
16.792	6.164
16.036	6.386
16.716	6.344
16.135	7.121
15.865	7.661
16.252	7.985
16.181	7.262
16.494	7.143
16.174	7.279
14.305	6.362
13.558	6.381
15.979	6.933
16.73	7.721
16.862	8.107
16.886	8.211
18.001	8.223
16.978	8.33
17.364	8.23
18.435	8.074
19.738	7.901
19.34	7.785
19.728	8
20.06	7.681
18.691	7.847
20.137	7.586
19.442	7.987
19.337	7.847
18.909	7.89
18.775	7.87
19.931	8.046
19.056	8.246
19.712	8.799
19.535	8.197
19.278	7.142
18.558	7.504
19.375	6.775
19.614	6.81
19.81	6.808
20.386	6.788
19.44	5.916
19.757	6.497
19.842	5.829
19.942	6.349
20.685	6.732
20.053	6.58
20.966	6.504
22.055	6.963
22.68	7.279
22.605	6.816
22.369	6.604
22.076	6.737
21.518	5.632
21.431	5.523
22.19	5.867
23.108	5.887
25.293	6.217
26.166	5.951
25.765	6.166
25.77	5.681
26.263	6.567
28.094	5.837
27.951	6.409
29.031	5.753
29.377	6.272
30.04	4.746
29.283	5.691
28.512	5.866
29.152	5.452
29.407	5.883
27.214	6.083
29.001	6.492
29.135	6.665
28.874	7.26
29.557	7.288
28.94	7.509
29.04	7.506
28.993	8.056
29.677	7.491
29.516	7.386
29.475	6.731
27.177	5.62
26.866	5.544
26.634	6.638
27.626	8.269
27.47	4.541
28.861	5.688
29.831	5.134
28.776	6.122
29.7	3.609
27.441	3.038
26.454	3.431
27.621	2.657
27.794	2.47
26.188	2.995
28.828	2.725
29.016	2.545
29.267	3.417
28.336	4.423
27.75	3.886
28.921	3.495
27.809	3.223
27.477	2.796
28.384	3.4
28.517	1.559
28.472	2.217
28.776	2.141
29.399	3.133
27.29	2.929
28.013	2.077
26.636	2.314
27.045	2.231
25.294	2.705
27.398	2.79
27.036	2.54
24.839	5.556
25.793	4.995
26.473	5.798
26.243	4.017
26.075	5.338
27.006	4.65
24.417	4.697
27.762	3.899
26.851	4.344
27.111	4.226
27.363	3.372
27.744	1.336
25.94	0.938
26.307	0.352
27.267	0.391
26.598	1.089
26.049	1.994
26.978	1.493
27.024	1.082
25.296	2.002
26.247	0.956
26.082	0.274
24.874	1.02
24.833	1.086
26.729	0.669
26.483	0.951
26.967	1.665
26.736	2.015
26.605	1.688
27.206	1.794
26.309	0.193
25.691	2.672
26.333	1.911
26.377	3.019
26.194	1.843
25.938	1.166
26.505	1.576
26.477	2.087
26.18	2.41
26.191	2.521
26.203	1.969
26.548	2.105
26.218	2.828
25.965	2.159
26.006	2.859
25.624	3.31
26.3	3.739
26.46	2.913
25.45	4.171
25.833	3.395
25.83	1.521
26.67	2.803
24.782	4.307
25.844	5.536
25.56	4.431
26.27	4.952
25.725	5.303
26.149	4.445
26.283	4.069
27.667	5.22
29.701	3.416
32.129	2.269
23.886	-2.307
24.178	-2.793
24.327	-1.616
27.602	-1.104
31.187	0.429
33.649	0.997
34.039	2.351
35.38	2.515
35.124	1.192
32.891	-0.117
31.611	-1.309
36.029	1.658
37.358	1.415
36.752	1.622
30.361	3.298
35.975	1.808
43.052	1.448
42.548	2.478
42.473	2.303
43.261	1.939
41.215	2.635
41.265	2.248
41.19	1.559
40.428	0.775
41.285	0.672
41.285	0.736
39.97	-0.607
41.5	-0.629
41.863	0.948
43.51	1.511
41.479	3.737
43.779	3.881
42.79	4.678
43.673	5.12
44.881	4.679
42.097	4.409
39.411	5.624
40.522	4.452
41.361	4.917
40.855	4.984
41.022	4.333
41.212	3.833
40.727	3.829
41.381	2.701
40.581	3.164
38.785	2.646
38.351	2.458
38.379	2.644
38.353	3.329
33.651	2.358
35.043	2.091
34.57	2.582
34.401	1.83
26.931	-4.319
29.038	1.78
31.234	1.723
30.737	1.607
31.17	2.075
30.027	3.126
30.195	2.776
28.185	3.223
27.338	3.503
26.792	3.612
26.884	3.189
27.351	3.191
26.343	3.833
23.695	5.315
23.71	4.176
23.777	4.812
24.102	4.744
23.868	4.636
23.284	4.716
22.288	4.874
22.314	4.277
22.36	4.606
22.205	5.33
22.953	4.841
22.161	6.121
22.616	5.042
21.67	4.024
22.161	4.911
21.051	4.805
20.994	4.078
21.046	4.423
20.376	3.923
21.639	3.848
21.581	2.971
21.269	3.862
20.519	4.019
21.104	4.269
22.023	4.025
22.86	3.83
23.145	3.107
21.76	3.68
22.805	2.563
21.649	2.245
20.247	0.374
12.041	-1.982
11.435	-1.869
12.96	-1.201
13.704	-1.453
13.996	-1.762
15.345	0.067
16.975	-0.014
18.554	0.995
20.681	2.633
22.826	3.277
23.761	2.54
22.899	2.253
22.461	1.192
22.004	2.441
22.224	1.871
23.006	1.35
23.751	1.892
23.689	1.01
24.025	0.703
24.012	0.994
24.379	3.225
24.25	3.963
24.405	4.191
24.082	5.422
23.713	4.415
23.831	4.954
23.24	4.57
23.2	4.101
23.074	4.552
23.057	4.825
22.259	5.197
23.26	5.338
22.623	4.837
22.821	4.399
22.933	5.265
23.175	4.978
23.422	4.948
23.845	5.676
24.186	4.674
23.732	4.701
23.63	4.485
21.833	3.509
22.432	4.109
22.006	3.771
22.187	3.46
22.321	3.066
21.925	3.153
22.618	3.101
21.999	2.063
21.275	4.98
19.534	5.729
22.751	5.494
24.182	5.642
24.003	6.034
23.708	5.758
23.463	5.437
22.497	5.435
23.303	5.535
23.73	5.919
23.325	5.292
24.069	5.924
24.409	5.993
23.69	5.266
23.676	5.562
21.408	4.401
21.936	5.699
23.33	5.91
21.082	4.834
22.323	5.373
22.497	5.769
23.281	6.328
24.669	6.637
25.31	5.736
24.848	5.881
25.653	6.793
25.078	6.267
26.329	6.313
26.83	6.732
20.916	7.38
17.324	8.385
17.906	8.133
24.039	8.037
29.179	6.616
29.605	6.344
29.33	6.976
29.364	8.314
29.747	8.034
30.094	7.904
30.585	7.007
29.891	7.14
29.094	6.242
25.785	6.804
24.92	6.004
25.947	6.628
16.693	4.026
17.395	3.725
17.69	3.706
17.483	3.886
20.158	4.245
25.58	4.575
26.505	6.042
27.624	6.571
28.814	6.406
30.46	7.992
31.149	8.272
31.569	8.434
30.936	7.57
30.004	7.224
31.789	7.165
32.334	7.658
31.894	7.521
32.804	7.674
32.813	7.834
31.981	8.832
31.22	8.663
31.533	8.518
32.378	9.4
32.446	9.464
32.974	8.73
33.177	9.406
33.461	9.008
31.31	9.091
32.068	8.286
31.966	8.332
32.543	8.176
33.29	9.198
32.68	9.63
33.04	8.945
33.49	9.151
33.446	8.839
33.893	9.097
33.651	8.796
32.493	8.746
33.125	5.77
33.546	6.579
34.074	6.78
34.182	6.661
34.635	3.035
33.115	2.397
34.419	2.657
32.236	2.54
33.638	2.405
32.429	2.196
32.288	1.99
32.013	1.82
31.767	1.748
33.198	1.846
30.541	1.008
29.808	1.157
29.843	0.751
31.425	1.701
31.654	1.037
32.161	1.238
32.822	0.972
32.809	1.543
31.974	2.677
31.565	1.458
31.064	2.406
31.139	1.866
31.836	1.693
30.5	2.711
32.216	2.62
31.832	2.639
31.842	3.926
32.645	3.671
32.146	3.387
32.587	2.738
32.198	4.002
32.794	4.082
30.436	2.552
29.785	1.942
29.304	2.859
31.837	3.842
33.495	5.226
33.808	5.27
33.394	5.136
33.555	4.314
32.313	4.602
32.926	4.509
30.959	4.864
30.789	3.847
31.051	3.843
28.307	3.563
29.881	3.96
30.037	3.986
30.093	2.664
30.912	2.088
31.023	2.09
30.433	1.124
30.113	0.875
27.586	-0.07
20.697	-2.224
21.686	-1.209
20.982	-1.869
19.111	-2.129
20.952	-1.711
22.24	-0.935
26.203	0.226
27.12	0.093
26.524	0.089
29.421	-0.087
29.284	0.615
28.468	0.254
29.433	0.031
29.904	0.12
29.943	0.133
29.266	-0.639
29.311	0.134
29.827	0.724
29.886	1.382
27.562	0.615
28.839	0.369
28.702	1.007
30.277	1.611
29.279	1.288
29.135	1.411
29.23	0.784
28.604	1.089
28.913	0.948
26.143	-1.069
26.111	-1.25
27.328	-1.027
27.842	-1.116
29.868	-0.682
30.516	0.254
31.136	1.076
29.544	1.466
29.838	0.77
30.893	0.492
30.527	1.195
30.039	0.358
30.451	0.763
29.221	0.56
29.982	0.227
30.013	1.089
29.433	-0.183
29.804	-0.391
30.195	-0.383
30.737	-0.494
29.064	-1.125
29.764	-0.581
29.929	-1.243
30.285	-1.691
29.912	-1.859
27.809	-2.405
29.618	-1.809
28.347	-2.54
27.276	-2.82
28.089	-2.502
27.491	-2.26
28.755	-2.02
28.395	-1.795
28.777	-1.62
29.765	-0.851
29.024	-0.514
29.142	-0.312
29.525	0.113
28.324	0.603
28.484	0.534
28.319	-0.835
27.508	-0.825
26.528	-0.123
27.333	-0.396
25.538	0.684
26.318	0.354
25.999	0.415
25.005	1.492
25.065	0.923
23.34	1.27
20.234	-0.26
20.243	-0.534
19.489	-0.632
17.527	0.06
19.031	0.285
19.533	-0.086
17.539	2.117
20.512	2.307
20.371	1.528
20.931	2.36
21.126	2.401
20.858	2.822
20.791	1.929
20.091	1.674
20.15	1.94
19.778	1.561
19.535	0.086
18.869	0.171
19.165	0.553
18.328	1.537
14.805	0.496
11.547	-1.352
17.9	0.571
20.343	2.1
21.504	2.066
23.241	2.02
21.398	3.035
21.096	2.494
21.032	2.875
20.65	5.243
21.218	5.395
20.856	4.567
20.631	5.621
21.242	5.568
21.439	5.708
20.509	5.348
19.402	5.719
22.827	5.891
23.072	6.217
22.432	6.251
19.641	5.521
20.016	5.411
20.671	5.57
22.324	5.232
21.692	5.267
21.499	5.69
24.171	4.972
23.9	5.127
20.545	4.796
23.614	5.458
24.412	6.043
24.994	5.849
23.365	3.979
24.227	4.804
24.819	5.547
24.918	5.859
25.348	5.679
24.6	5.734
24.777	5.1
24.854	5.651
24.228	5.667
23.4	5.513
23.633	5.287
23.68	4.4
23.711	3.877
23.333	3.986
24.619	4.904
21.11	5.004
24.333	5.908
25.766	6.006
25.954	5.384
25.23	5.182
26.794	4.798
23.645	4.689
23.485	5.301
23.345	5.171
23.079	4.671
23.296	5.077
23.688	5.128
23.606	5.822
23.849	6.042
26.164	5.982
27.25	5.154
26.825	5.305
27.563	5.821
27.87	6.227
26.814	6.039
26.764	5.333
25.117	5.184
25.149	5.34
24.733	6.276
26.865	6.112
26.847	6.292
26.969	7.192
26.392	6.238
26.646	5.737
26.98	5.289
27.614	6.186
27.987	7.128
28.136	6.982
29.424	7.023
28.403	7.404
27.308	7.489
27.615	8.045
27.99	7.878
28.996	8.335
29.059	6.971
28.995	8.068
28.856	7.484
28.518	8.161
28.748	7.875
28.55	8.237
28.862	8.958
29.039	8.763
28.517	8.993
29.603	8.329
30.251	8.479
30.63	8.331
27.6	9.166
20.101	1.676
21.335	2.581
22.288	3.848
23.647	3.958
23.371	3.074
24.802	3.117
24.798	2.545
24.273	1.988
23.703	2.147
24.49	2.161
23.912	1.696
21.595	1.993
23.445	3.349
24.138	2.7
23.439	2.842
23.713	2.753
22.947	2.981
22.679	2.974
23.595	2.594
23.221	2.292
23.961	2.826
23.774	2.648
22.234	0.124
21.445	-0.736
21.06	0.078
22.495	2.288
22.345	1.923
23.329	2.598
23.431	2.356
22.905	2.587
22.965	2.253
23.037	2.111
19.925	2.178
21.976	-1.327
21.068	-0.854
21.133	-0.808
21.24	-0.623
19.543	-0.475
19.91	-0.745
20.14	-1.232
18.813	-0.661
18.997	-0.452
16.141	-1.536
18.741	-1.632
11.945	-1.134
6.148	-1.643
5.781	-1.74
6.484	-2.209
8.734	-0.219
8.154	-0.404
8.746	-0.819
16.305	-2.952
20.402	-3.961
19.872	-1.962
20.522	-1.505
20.822	-1.203
20.893	-1.702
21.915	-1.555
21.66	-0.65
18.268	-1.361
18.913	-0.175
18.026	-0.468
19.793	0.02
19.173	-0.477
19.355	-0.579
22.367	-0.168
20.07	0.483
20.198	-0.399
19.788	-1.243
19.352	-1.36
19.407	-0.438
22.26	0.242
22.063	0.028
22.782	0.431
22.9	0.356
23.023	1.011
22.952	0.733
22.303	0.874
21.918	0.391
21.936	0.533
22.248	0.823
21.74	0.19
21.465	1.032
22.044	1.406
20.093	0.88
20.182	-0.137
20.378	0.469
18.807	-0.358
20.136	-0.767
19.569	-0.723
17.843	-2.402
18.441	-1.615
18.593	-1.804
18.789	-0.17
19.111	-0.084
21.117	0.23
18.534	0.486
19.628	0.439
20.417	0.241
20.752	0.02
20.485	-0.163
14.123	1.425
19.535	-0.242
20.274	0.188
20.604	0.289
20.393	0.13
20.827	0.356
21.821	0.066
21.957	-0.002
21.911	0.164
21.418	0.711
22.074	0.079
21.584	0.572
17.987	-0.444
4.884	0.33
6.299	0.115
7.674	1.789
8.6	1.948
8.725	1.363
8.455	1.846
9.385	2.06
8.597	1.351
9.161	2.104
8.978	1.805
8.872	2.023
8.89	2.411
9.241	1.806
9.567	1.631
9.107	1.629
9.714	1.454
13.985	0.602
22.995	-0.657
23.216	-1.062
23.109	-1.377
23.439	-0.723
21.955	-1.766
21.758	-2.309
21.712	-2.12
22.615	-2.297
17.848	-3.007
20.353	-3.296
19.107	-4.065
21.469	-0.053
22.666	1.365
23.759	1.343
22.918	1.72
22.731	1.511
21.687	1.185
21.622	0.288
22.152	1.924
22.062	1.704
15.974	2.126
9.913	4.56
9.532	4.103
9.171	3.559
15.766	2.184
20.281	1.878
19.574	1.517
19.874	1.435
18.415	1.236
19.761	1.778
18.097	2.395
16.404	0.223
16.062	2.067
16.455	2.061
16.512	2.562
17.604	2.946
17.608	2.573
17.816	2.607
17.735	2.707
17.018	2.891
17.595	3.28
17.653	3.363
16.493	3.283
15.802	3.583
17.884	4.105
19.198	1.376
18.826	2.047
18.35	2.877
17.296	3.987
19.47	4.412
19.183	5.612
17.03	4.009
16.06	1.911
15.8	0.889
13.382	-0.479
12.205	-2.354
10.97	-2.9
10.823	-3.01
11.718	-1.367
11.75	-0.322
11.49	-1.19
11.972	-1.262
12.437	-1.228
12.267	-0.215
11.715	-0.698
14.561	2.582
14.184	1.833
15.128	2.306
14.709	1.537
14.627	2.07
13.119	2.107
14.685	0.865
14.682	1.386
14.853	2.322
14.409	2.323
15.802	2.343
15.813	2.77
15.247	2.04
14.893	2.078
12.585	3.35
16.023	3.051
16.272	4.097
17.387	4.309
16.974	4.493
16.445	5.54
17.434	5.189
18.075	6.071
18.685	6.113
17.979	6.218
17.439	6.28
13.979	-0.573
13.147	0.465
13.342	0.397
13.974	0.668
13.86	1.329
15.411	3.64
14.791	4.198
15.009	4.077
14.477	3.77
13.233	4.506
14.385	4.318
14.376	5.172
15.177	5.049
15.026	5.474
15.376	5.825
15.33	5.918
14.979	6.696
16.664	7.53
16.454	7.583
17.59	7.491
17.848	7.808
13.545	7.77
17.363	7.72
17.927	7.086
17.039	6.985
16.304	7.413
14.38	8.074
16.146	7.6
16.316	8.403
14.398	8.133
15.828	7.976
16.942	7.924
17.443	8.049
16.854	8.054
16.62	7.584
6.051	9.735
10.416	9.284
18.494	7.702
20.252	7.621
21.29	7.847
22.51	7.721
22.851	7.516
23.484	7.934
23.896	8.558
23.618	8.261
23.965	8.326
24.874	8.75
24.589	8.729
24.786	9.214
22.96	9.665
22.308	10.295
22.59	9.806
23.446	9.682
23.412	9.765
24.175	9.554
22.851	9.914
19.935	10.155
19.747	10.09
19.421	10.541
19.692	10.632
20.203	10.021
9.961	3.435
3.471	-2.058
3.181	-2.591
2.866	-2.628
4.743	-0.574
9.856	-0.632
12.51	-0.705
13.68	-0.799
14.009	-0.734
14.955	-0.783
13.787	-0.424
14.481	-0.598
14.541	0.026
14.376	-0.022
15.846	1.32
15.727	1.164
16.615	1.575
17.754	2.32
18.169	2.653
20.623	2.843
18.511	3.499
21.183	3.598
20.953	3.933
20.023	3.762
19.265	3.589
14.564	2.474
13.739	2.86
13.833	3.108
17.843	7.005
20.648	7.127
19.875	7.826
21.25	8.909
24.075	8.266
22.965	8.435
25.213	9.095
18.421	9.437
20.596	7.478
24.153	9.86
25.079	9.679
13.391	7.456
13.781	5.462
13.45	5.509
4.012	-12.48
3.393	-12.633
3.586	-9.94
3.686	-9.895
4.226	-10.37
3.422	-10.549
2.569	-7.227
2.685	-7.602
1.585	-5.401
2.132	-5.503
1.749	-5.207
1.722	-3.95
2.041	-2.39
2.2	-2.562
2.073	-2.404
1.831	-2.326
1.889	-2.376
2.329	-2.115
1.657	-2.06
2.26	-1.929
2.202	-2.273
2.105	-1.877
5.718	0.796
9.581	3.281
9.943	2.424
11.128	2.537
15.604	6.14
18.975	10.058
21.441	10.976
28.191	15.48
32.446	11.143
35.049	12.882
31.754	1.966
30.801	1.286
31.504	5.778
25.122	3.68
24.214	3.108
24.244	3.494
24.667	2.907
24.24	2.56
24.589	2.231
25.033	1.49
25.503	0.34
25.984	0.018
25.371	-0.854
25.84	-2.105
26.838	-2.123
27.665	-3.543
27.494	-2.703
27.442	-1.649
27.075	-2.043
26.089	-2.469
24.67	-4.223
24.725	-3.635
25.675	-3.296
25.605	-2.919
25.862	-2.893
26.003	-3.05
26.629	-1.859
26.46	-1.476
27.734	-2.506
27.798	-3.754
27.387	-3.18
26.132	-3.276
19.873	-2.728
23.495	-3.178
20.16	-2.547
21.599	-3.804
20.162	-4.056
18.516	-3.091
18.475	-2.997
18.917	-3.401
18.253	-3.293
19.055	-4.294
18.06	-4.24
16.848	-2.629
21.856	-2.382
19.778	-2.225
16.773	-3.127
14.025	-3.697
13.467	-2.825
12.701	-1.833
15.84	-1.216
14.966	-1.904
15.988	-6.921
16.915	-7.183
17.515	-6.622
17.06	-6.535
18.199	-7.163
18.673	-6.962
19.48	-6.685
18.74	-8.799
19.679	-5.924
20.542	-4.692
21.508	-4.871
22.526	-4.056
25.54	-3.481
25.485	-3.582
26.481	-3.376
27.555	-2.083
27.988	-1.708
28.334	-1.493
28.003	-3.311
28.267	-3.43
27.671	-4.854
30.405	-5.757
31.22	-8.044
31.915	-6.406
32.021	-5.562
31.183	-5.142
31.678	-5.234
31.642	-1.943
29.524	-2.059
32.162	-2.046
32.296	-1.783
32.098	-2.623
30.701	-1.277
29.082	-1.836
29.377	-0.843
29.974	-0.436
29.425	-0.771
30.164	-0.732
26.555	-0.36
21.636	0.222
17.538	0.666
17.376	0.699
28.499	-0.789
29.33	-0.745
28.08	-1.067
27.076	-1.549
26.439	-0.675
21.589	-0.05
20.525	-0.53
20.721	-0.573
21.324	1.298
20.679	2.772
21.585	3.771
21.36	4.15
21.898	4.503
20.268	5.264
20.38	4.969
21.174	4.475
16.362	-2.809
15.583	-2.794
15.84	-2.871
14.942	-2.997
17.576	-0.554
17.46	-1.044
16.445	-0.446
16.401	-0.198
16.319	0.107
9.351	-0.41
13.03	-1.288
13.693	-0.706
14.799	0.716
16.18	0.762
17.247	2.01
17.789	2.538
17.267	2.561
17.988	3.394
18.494	3.219
18.957	4.643
18.966	4.688
18.187	4.878
17.997	4.939
18.51	4.753
18.465	4.963
18.705	5.384
18.616	5.122
19.469	4.256
15.707	4.12
19.204	4.602
19.205	5.375
18.913	5.382
17.817	5.164
15.565	4.256
14.597	4.639
16.02	5.453
18.85	5.519
19.186	5.903
18.829	5.494
19.814	5.364
18.909	5.7
20.078	5.163
20.277	4.528
19.912	4.334
20.121	4.876
20.74	4.527
20.53	4.701
20.63	3.662
21.174	3.203
20.791	3.339
20.26	4.085
21.022	4.687
20.998	4.286
20.502	4.317
21.095	4.244
22.291	4.239
22.21	3.933
20.331	3.785
21.413	3.52
19.296	2.493
19.265	2.126
19.516	0.847
21.835	3.127
22.805	2.234
22.826	2.258
22.909	2.147
22.626	2.433
22.573	3.057
23.381	2.746
22.283	2.888
22.543	2.055
19.111	-1.418
20.375	2.417
23.906	5.878
24.175	5.877
24.444	5.816
24.565	5.61
24.151	5.318
24.609	5.176
25.66	5.246
25.147	4.519
27.073	4.512
25.185	2.128
24.826	1.883
26.393	3.208
28.008	3.853
29.469	3.796
29.797	4.298
28.769	5.042
30.086	4.824
30.301	5.356
28.063	5.202
29.087	4.073
29.589	5.897
31.179	5.397
30.028	6.27
30.287	6.467
31.161	5.003
30.863	5.262
31.606	6.001
33.019	5.904
33.61	5.697
32.819	5.917
32.674	6.645
30.308	6.451
30.55	5.148
29.933	4.522
29.943	5.054
30.08	6.224
28.228	7.043
31.538	6.373
32.053	6.145
31.935	6.354
32.164	6.539
31.788	5.684
29.107	6.103
33.671	6.397
34.095	6.188
27.914	0.978
27.504	1.683
27.445	1.284
27.729	0.993
27.515	0.548
27.608	0.123
27.558	0.554
27.893	0.699
28.959	0.187
29.777	0.435
30.924	1.499
30.245	1.08
31.835	2.818
33.588	2.551
33.981	0.609
33.47	-0.072
33.214	1.025
33.525	1.843
35.93	1.875
36.862	1.101
37.528	2.213
36.746	1.735
36.054	2.122
36.561	1.777
36.04	1.179
35.44	0.705
36.869	-1.803
36.402	-2.762
36.933	-2.427
37.51	-2.888
37.445	-4.666
36.897	-4.084
37.236	-4.094
36.208	-4.413
34.782	-6.332
33.971	-6.114
35.544	-6.449
34.636	-5.068
35.226	-5.513
34.703	-5.842
35.524	-5.233
30.944	-7.784
32.725	-7.876
30.832	-6.236
35.372	-5.099
35.944	-7.052
36.981	-6.966
36.95	-7.363
34.96	-5.805
36.23	-5.938
35.013	-5.777
35.913	-5.156
35.086	-5.448
34.717	-5.185
35.956	-4.667
36.694	-5.131
36.882	-5.198
36.603	-5.738
33.034	-6.676
32.628	-6.827
32.779	-5.193
33.568	-5.363
35.354	-5.055
34.722	-4.929
23.368	-3.929
22.304	-2.931
22.459	-3.097
21.914	-3.323
29.496	-4.139
34.665	-5.486
33.42	-5.444
30.47	-5.775
34.083	-5.006
30.64	-5.121
31.83	-5.906
32.895	-4.66
31.582	-5.217
35.122	-5.062
38.704	-3.891
38.455	-4.726
39.463	-3.834
38.583	-3.906
38.877	-3.846
37.209	-3.828
35.583	-3.358
36.832	-5.805
37.279	-5.658
36.586	-6.253
36.051	-6.013
35.696	-5.876
37.016	-6.05
38.003	-4.67
39.439	-4.699
39.389	-4.016
40.032	-6.49
41.656	-5.266
41.56	-4.033
41.571	-4.436
41.618	-3.855
42.496	-3.844
41.955	-4.279
41.207	-4.831
42.122	-4.812
42.168	-5.504
42.235	-5.89
39.742	-5.744
39.316	-5.83
38.79	-6.591
40.185	-6.977
37.188	-6.971
33.061	-8.728
34.236	-8.428
35.197	-7.922
36.351	-7.235
37.412	-7.154
37.096	-6.602
37.752	-7.352
37.664	-7.292
37.203	-7.537
34.903	-7.343
35.169	-6.989
35.768	-7.107
35.025	-7.529
36.642	-8.296
37.404	-5.017
35.113	-5.552
36.08	-5.38
39.371	-5.794
37.908	-4.743
38.782	-5.382
39.371	-5.101
39.027	-4.772
38.45	-3.925
39.065	-4.887
40.81	-3.529
38.927	-3.657
37.955	-5.516
36.709	-4.939
35.745	-5.892
36.248	-5.048
38.118	-4.069
38.476	-3.056
38.165	-2.402
37.042	-2.115
38.286	-2.561
39.145	-2.47
40.825	-2.23
39.075	-2.24
40.284	-2.072
39.321	-2.049
37.127	-1.999
38.728	-2.777
28.276	-1.494
26.79	4.692
34.611	3.418
36.719	3.139
36.16	2.703
35.092	2.092
33.774	1.089
33.804	0.967
33.038	2.182
[truncated: 9,803 more rows]
